# Supplementary material for: The Fossil Fuel Emissions of Tokyo estimated directly from measurements of the Tsukuba TCCON site
Source: Copernicus journal article supplement (doi:10.5194/amt-2018-224), 2018-10-05

# Residuals by wind direction and speed at the Tsukuba site (tk)

## Negative $\Delta XCO_2$ (y - fit)

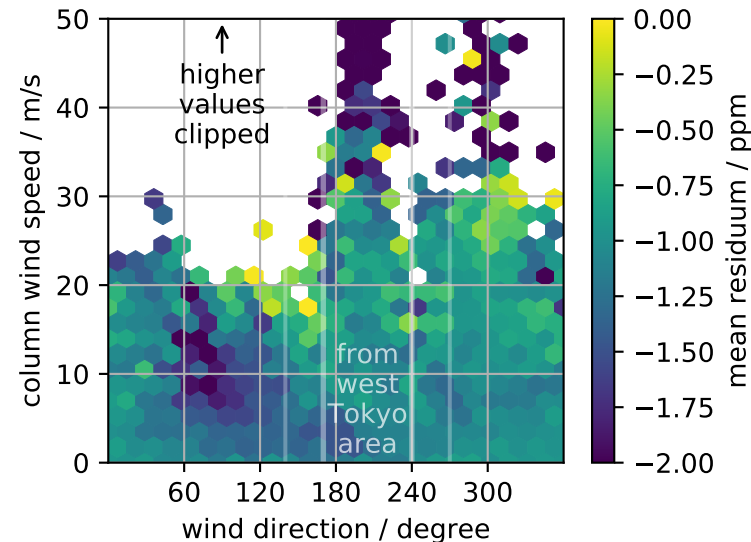

## Tokyo Area

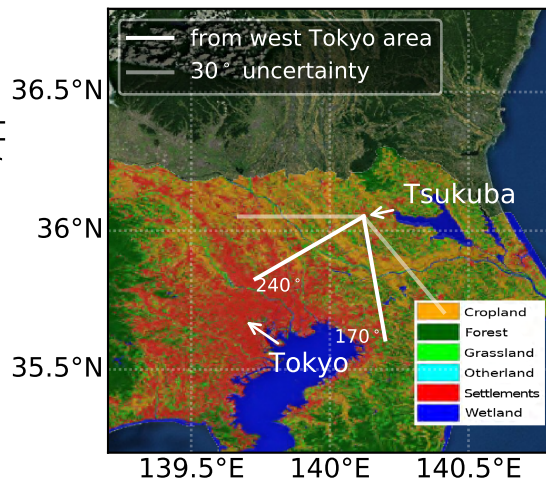

Surface type overlay from  
Bagan 2014, doi:10.1088/1748-9326/9/6/064015

## Positive $\Delta XCO_2$ (y - fit)

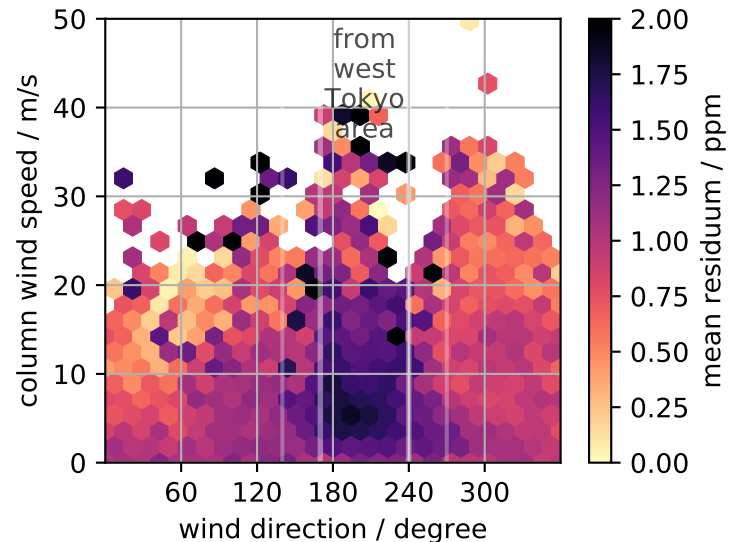

Supplement: Supplementary file 6 [file tk20110804_20160330.public-hexbin-wind-speed-xco2.pdf › tccon-data/tk20110804_20160330.public-hexbin-wind-speed-xco2.pdf]
