# Supplementary figures and images for: The Fossil Fuel Emissions of Tokyo estimated directly from measurements of the Tsukuba TCCON site
Source: Copernicus journal article supplement (doi:10.5194/amt-2018-224), 2018-10-05

# Odiac emissions by wind direction

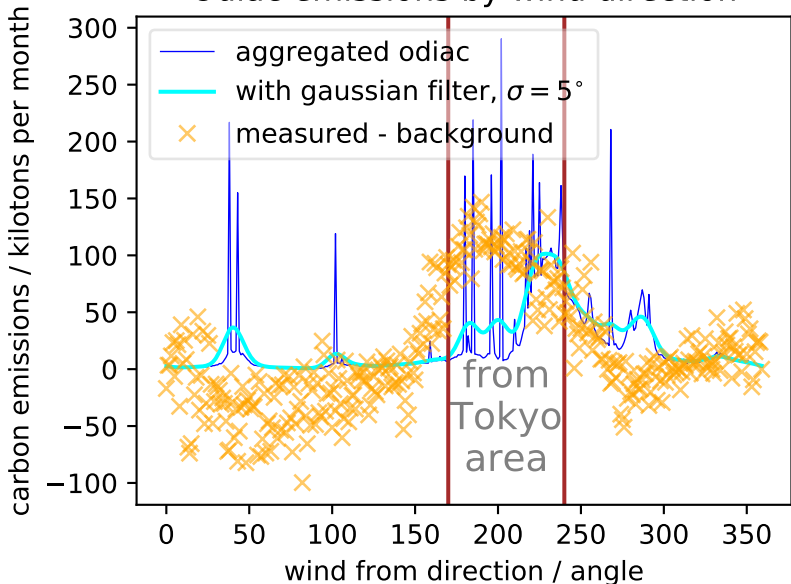

Supplement: Supplementary file 2 [file odiac-emissions-by-angle.pdf › odiac-emissions-by-angle.pdf]

# Scaling ground wind speed to profile below 1000m

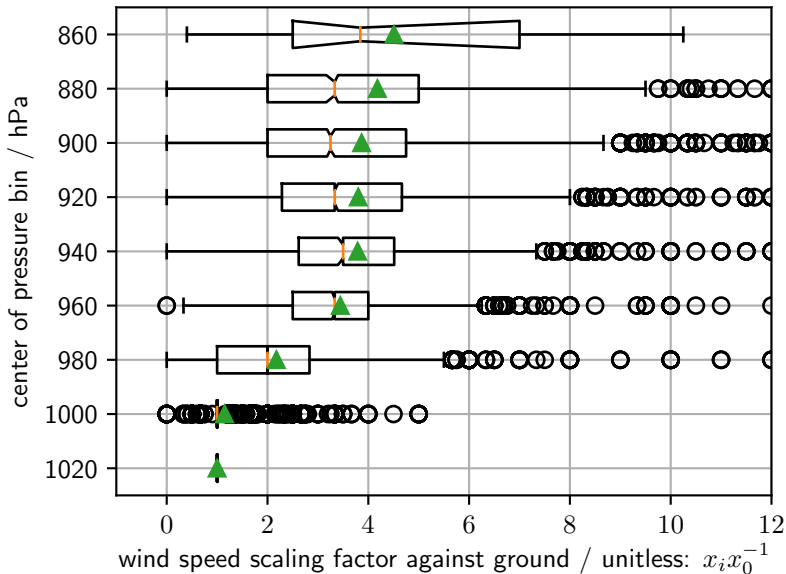

Supplement: Supplementary file 3 [file tateno-sounding-profiles-boxplot.pdf › tateno-sounding-profiles-boxplot.pdf]

# Average daily cycle in Tsukuba, Japan (tk)

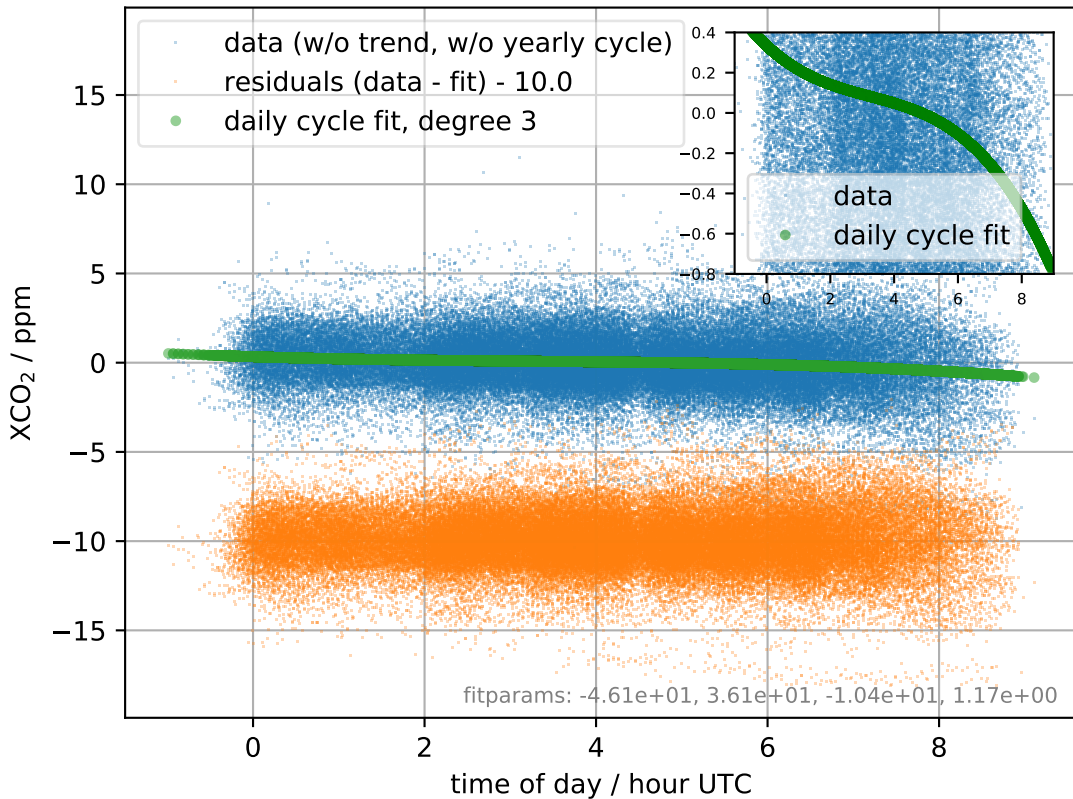

Supplement: Supplementary file 4 [file tk20110804_20160330.public-fit-daily-xco2.pdf › tccon-data/tk20110804_20160330.public-fit-daily-xco2.pdf]

Trend and average seasonal cycle in Tsukuba, Japan (tk)

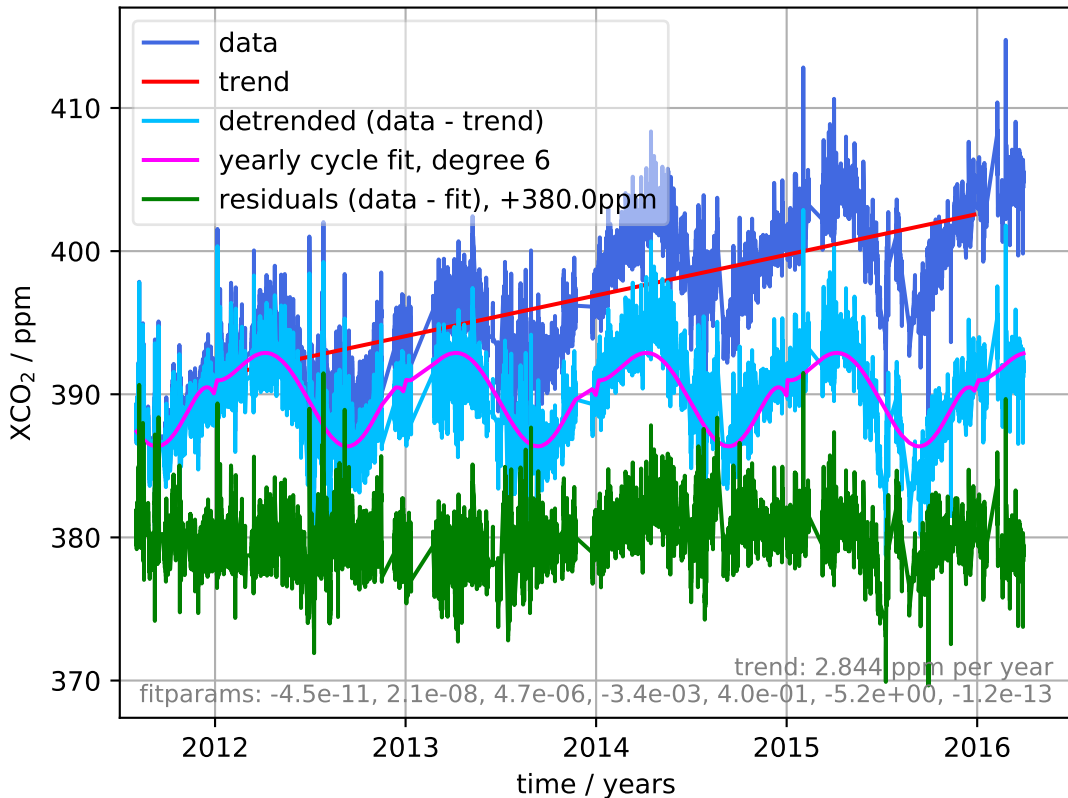

Supplement: Supplementary file 5 [file tk20110804_20160330.public-fit-xco2.pdf › tccon-data/tk20110804_20160330.public-fit-xco2.pdf]

Tsukuba,  $\bar{\Delta}=126.4\pm28.7\text{ g m}^{-1}\text{s}^{-1}$ ,  $5 < \text{wspd ms}^{-1} < 15$

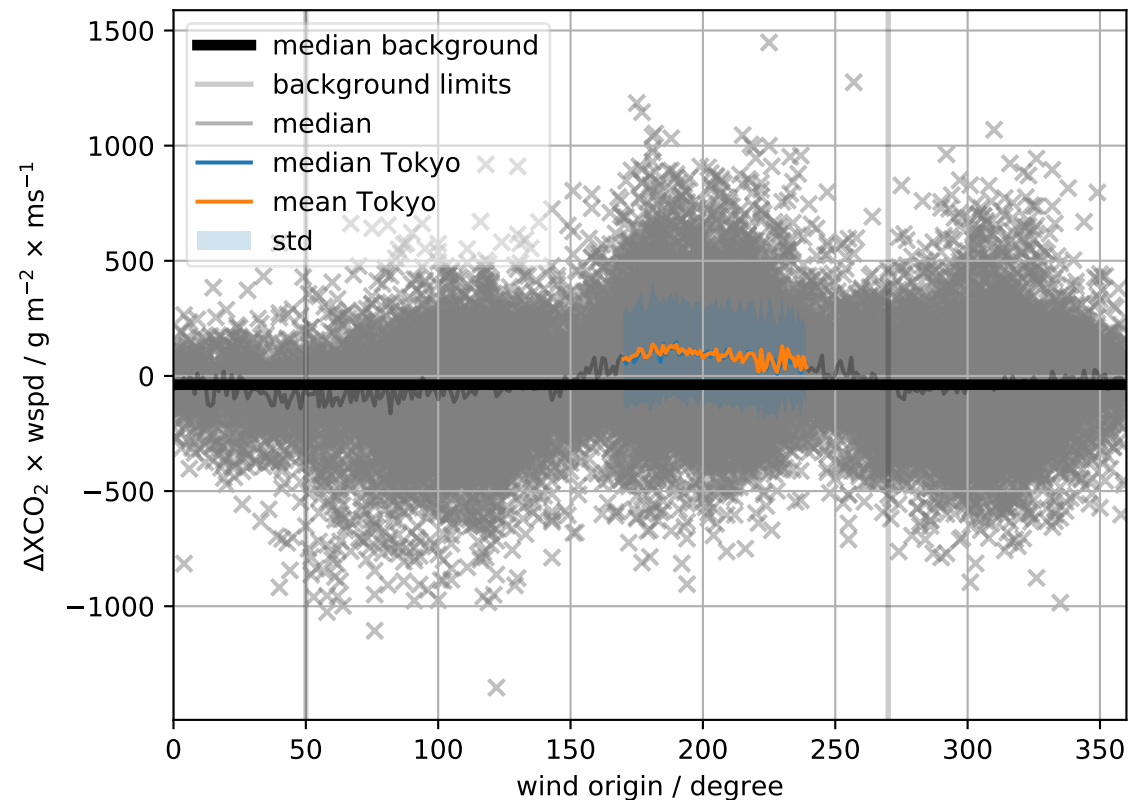

Supplement: Supplementary file 7 [file tk20110804_20160330.public-tsukuba-residuals-xco2.pdf › tccon-data/tk20110804_20160330.public-tsukuba-residuals-xco2.pdf]

# Average daily cycle in Tsukuba, Japan (tk)

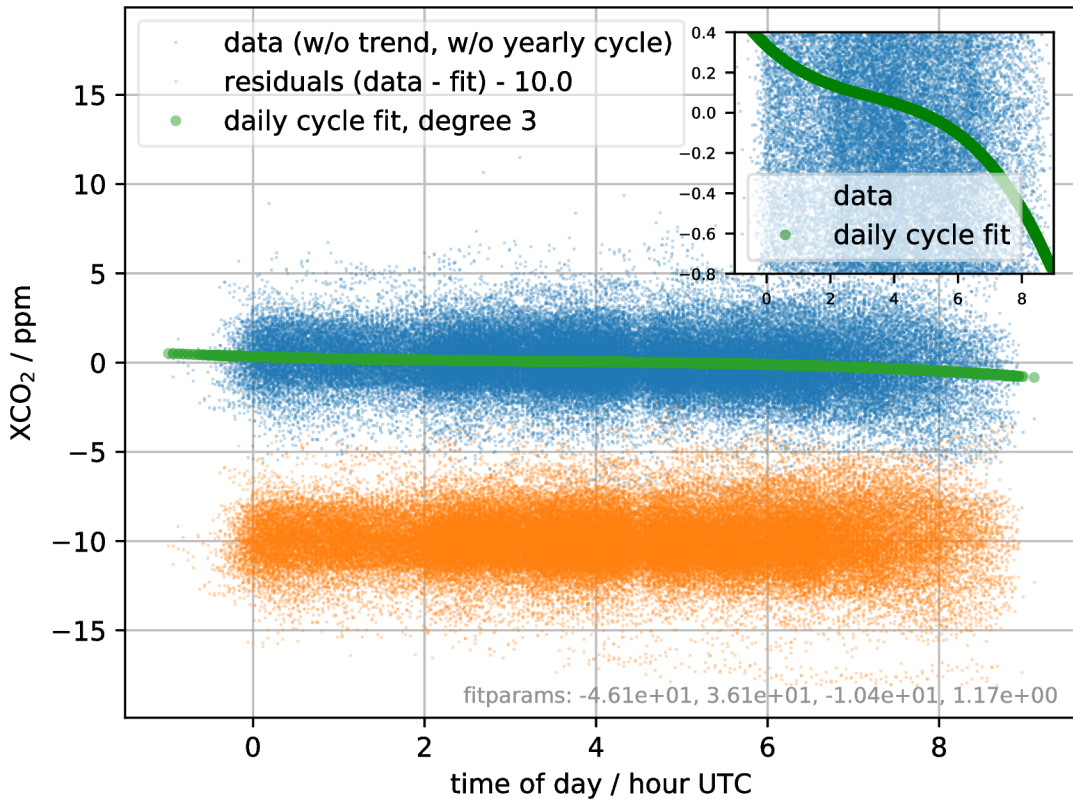

Supplement: Supplementary file 8 [file tk20110804-20160330-public-fit-daily-xco2.pdf › tk20110804-20160330-public-fit-daily-xco2.pdf]
